# Supplementary material for: Sensing the polar molecules MH3 (M = N, P, or As) with a Janus NbTeSe monolayer
Source: Royal Society of Chemistry journal article supplement (doi:10.1039/d0nj01022g), 2020-01-01
Supplement: d0nj01022g1.pdf [file d0nj01022g1.pdf]

## Supplementary Materials

### Sensing the polar molecules $MH_3$ ( $M=N, P, \text{ or } As$ ) with Janus NbTeSe monolayer

Xiaoyong Yang <sup>a,b</sup>, Deobrat Singh <sup>\*a</sup>, Zhitong Xu <sup>b</sup>, and Rajeev Ahuja <sup>\*a,c</sup>

<sup>a</sup> Condensed Matter Theory Group, Materials Theory Division, Department of Physics and Astronomy, Uppsala University, Box 516, 75120 Uppsala, Sweden

<sup>b</sup> Southwest University of Science and Technology, Mianyang 621010, China

<sup>c</sup> Applied Materials Physics, Department of Materials and Engineering, Royal Institute of Technology (KTH), S-100 44 Stockholm, Sweden

\*Corresponding author: [deobrat.singh@physics.uu.se](mailto:deobrat.singh@physics.uu.se); [rajeev.ahuja@physics.uu.se](mailto:rajeev.ahuja@physics.uu.se)

Fax: +46 184713524 Tel: +46 728772897

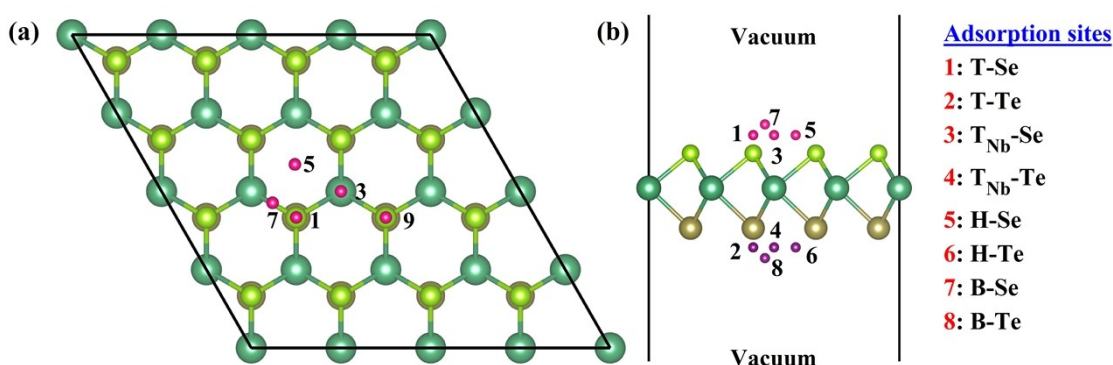

**Figure S1.** The structure of Janus NbSeTe monolayer from (a) top and (b) side views with possible adsorption positions for molecule  $NH_3$ ,  $PH_3$  and  $AsH_3$ , respectively.

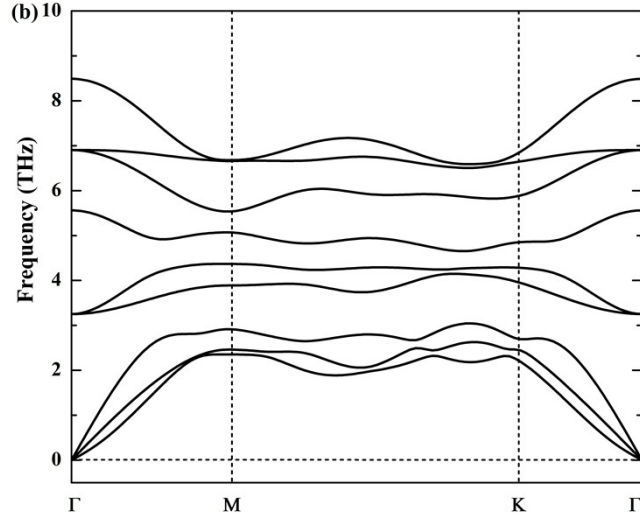

**Figure S2.** Calculated phonon band dispersion of Janus NbSeTe monolayer.

**Table S1.** The bond lengths and angles for NH<sub>3</sub>, PH<sub>3</sub> and AsH<sub>3</sub> gas molecules before and after adsorbed on Janus NbTeSe monolayer, respectively, corresponding to the adsorption energies in Figure S1.

| Type                 |                     | Bond length of the molecule (Å) |                 |                  | Angle of the molecule (°) |                 |                  |
|----------------------|---------------------|---------------------------------|-----------------|------------------|---------------------------|-----------------|------------------|
|                      |                     | NH <sub>3</sub>                 | PH <sub>3</sub> | AsH <sub>3</sub> | NH <sub>3</sub>           | PH <sub>3</sub> | AsH <sub>3</sub> |
| Pristine             |                     | 1.028                           | 1.433           | 1.539            | 106.046                   | 92.328          | 90.911           |
| Upward orientation   | T-Se                | 1.027                           | 1.434           | 1.541            | 106.906                   | 92.559          | 91.218           |
|                      | T-Te                | 1.028                           | 1.433           | 1.541            | 105.726                   | 91.851          | 90.621           |
|                      | T <sub>Nb</sub> -Se | 1.028                           | 1.434           | 1.541            | 106.375                   | 92.303          | 90.828           |
|                      | T <sub>Nb</sub> -Te | 1.028                           | 1.434           | 1.540            | 106.132                   | 92.058          | 90.659           |
|                      | H-Se                | 1.027                           | 1.432           | 1.541            | 106.806                   | 92.486          | 91.078           |
|                      | H-Te                | 1.028                           | 1.434           | 1.540            | 106.252                   | 92.058          | 90.659           |
|                      | B-Se                | 1.027                           | 1.433           | 1.540            | 106.655                   | 92.535          | 91.239           |
|                      | B-Te                | 1.028                           | 1.433           | 1.541            | 105.924                   | 91.927          | 90.628           |
| Downward orientation | T-Se                | 1.025                           | 1.432           | 1.540            | 106.516                   | 93.170          | 91.400           |
|                      | T-Te                | 1.029                           | 1.421           | 1.525            | 106.693                   | 93.059          | 91.358           |
|                      | T <sub>Nb</sub> -Se | 1.027                           | 1.431           | 1.540            | 106.754                   | 93.021          | 91.373           |
|                      | T <sub>Nb</sub> -Te | 1.027                           | 1.432           | 1.540            | 106.804                   | 92.939          | 91.277           |
|                      | H-Se                | 1.026                           | 1.431           | 1.540            | 107.335                   | 93.092          | 92.128           |
|                      | H-Te                | 1.027                           | 1.432           | 1.541            | 107.264                   | 93.656          | 91.967           |
|                      | B-Se                | 1.026                           | 1.431           | 1.540            | 107.655                   | 93.014          | 91.235           |
|                      | B-Te                | 1.018                           | 1.432           | 1.540            | 106.335                   | 92.753          | 91.394           |

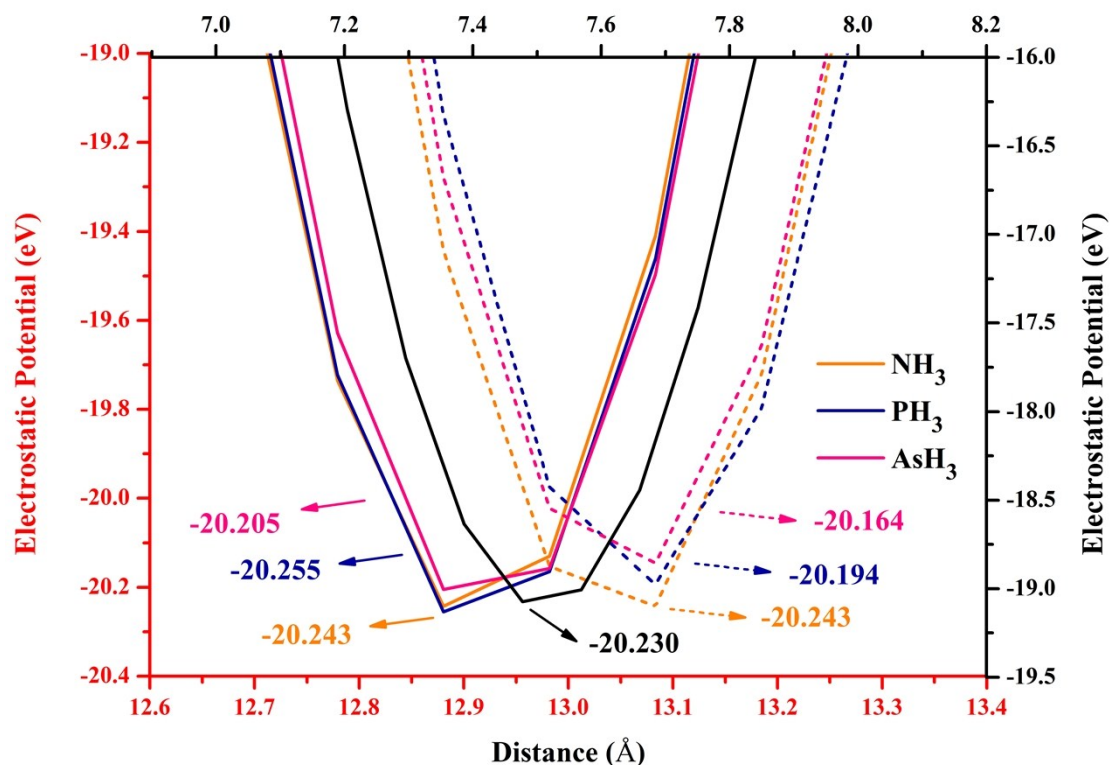

**Figure S3.** The electrostatic potential  $\phi$  (eV) of Se surface (solid lines) and Te (dash lines) surface of the gas molecule  $\text{NH}_3$ ,  $\text{PH}_3$  and  $\text{AsH}_3$  adsorption on Se-layer and Te-layer. In comparison to pure Janus NbTeSe monolayer. The corresponding electrostatic potential values are denoted with the different colors.

**Table S2.** Calculated the electrostatic potential shifting values  $\Delta\phi$  (eV) of Se and Te surfaces of the gas molecule  $\text{NH}_3$ ,  $\text{PH}_3$  and  $\text{AsH}_3$  adsorption on Te-layer (Se-layer), in comparison to pure Janus NbTeSe monolayer. The positive (negative) value of  $\Delta\phi$  represents up-shifting (down-shifting) of the gas molecule adsorbed surface, respectively.

| $\Delta\phi$ | $\text{NH}_3$ | $\text{PH}_3$ | $\text{AsH}_3$ |
|--------------|---------------|---------------|----------------|
| Se-layer     | -0.025        | -0.013        | 0.025          |
| Te-layer     | -0.013        | 0.036         | 0.066          |

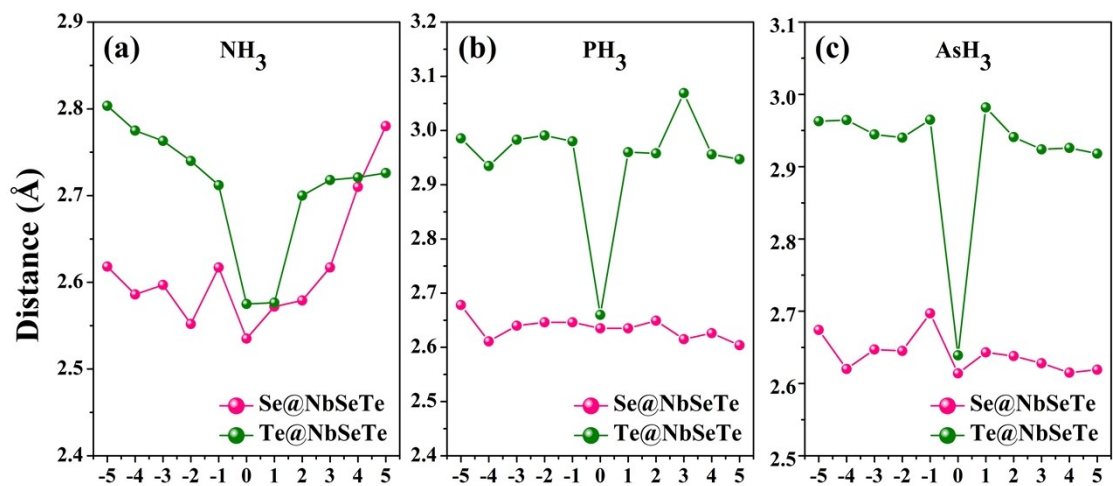

**Figure S4.** The variation of adsorption distance for NH<sub>3</sub>, PH<sub>3</sub> and AsH<sub>3</sub> adsorbed on Se-layer and Te-layer, respectively, as the function of applied biaxial tensile strain.
